# Supplementary material for: How Equitable Is Health Spending On Curative Services And Institutional Delivery In Malawi? Evidence From A Quasi-Longitudinal Benefit Incidence Analysis
Source: Research Square preprint supplement (doi:10.21203/rs.3.rs-700640/v1), 2021-07-26
Supplement: Supplementary file 1 [file 099cb1705f20c97bed0ebe8b.docx]

**Appendix**

Table1. Percentage share of annual utilization of curative health services by quintiles and facility type (2004, 2010 and 2016)

| Socioeconomic quintile | **2004** (n =5 0,882) | | | **2010** (n = 19,868) | | | **2016** (n = 53,873) | | |
| --- | --- | --- | --- | --- | --- | --- | --- | --- | --- |
| Public health facilities | CHAM health facilities | Private health facilities | Public health facilities | CHAM health facilities | Private health facilities | Public health facilities | CHAM health facilities | Private health facilities |
| 1 (Poorest) | 16.84 | 10.48 | 10.38 | 17.48 | 14.07 | 11.12 | 19.47 | 6.23 | 7.18 |
| 2 | 21.54 | 15.58 | 9.48 | 16.53 | 15.56 | 10.16 | 19.47 | 18.16 | 11.04 |
| 3 | 20.55 | 20.25 | 20.96 | 21.34 | 14.81 | 20.45 | 21.16 | 22.49 | 15.32 |
| 4 | 21.75 | 25.99 | 20.47 | 21.58 | 17.78 | 20.16 | 22.16 | 20.87 | 24.22 |
| 5 (Least poor) | 19.32 | 27.70 | 38.71 | 23.07 | 37.78 | 38.10 | 17.73 | 32.25 | 42.24 |

Table 2a. Percentage share of annual utilization of institutional delivery service by quintiles and facility type (2004 and 2010)

| Socioeconomic quintile | **2004** (n = 35,883) | | | | | **2010** (n = 72,286) | | | | |
| --- | --- | --- | --- | --- | --- | --- | --- | --- | --- | --- |
| Public hospitals | Public health centers | CHAM health centers | CHAM hospitals | Private health facilities | Public hospitals | Public health centers | CHAM health centers | CHAM hospitals | Private health facilities |
| 1 (Poorest) | 16.72 | 22.08 | 20.81 | 10.88 | 14.21 | 13.40 | 23.81 | 18.32 | 17.84 | 8.02 |
| 2 | 15.95 | 21.13 | 23.00 | 16.87 | 9.97 | 18.57 | 21.08 | 21.02 | 18.73 | 16.95 |
| 3 | 16.74 | 21.18 | 24.30 | 17.29 | 18.07 | 20.65 | 22.37 | 24.32 | 15.14 | 25.65 |
| 4 | 17.47 | 18.79 | 20.34 | 19.99 | 9.75 | 20.87 | 15.49 | 20.25 | 17.88 | 16.17 |
| 5 (Least poor) | 33.13 | 16.82 | 11.54 | 34.97 | 48.00 | 26.51 | 17.24 | 16.08 | 30.42 | 33.21 |

Table 2b. Percentage share of annual utilization of institutional delivery service by quintiles and facility type (2015)

| Socioeconomic quintile | **2015** (n = 68,074) | | | | |
| --- | --- | --- | --- | --- | --- |
| Public hospitals | Public health centers | CHAM health centers | CHAM hospitals | Private health facilities |
| 1 (Poorest) | 17.61 | 26.70 | 26.20 | 17.54 | 8,97 |
| 2 | 20.21 | 25.64 | 27.60 | 23.35 | 17.55 |
| 3 | 16.78 | 19.27 | 19.70 | 16.60 | 9.52 |
| 4 | 18.78 | 16.19 | 16.04 | 19.64 | 25.98 |
| 5 (Least poor) | 26.67 | 12.20 | 10.46 | 22.87 | 37.98 |
